# Supplementary material for: Inhibition of IL-11 signalling extends mammalian healthspan and lifespan
Source: PubMed Central journal article supplement (PMC11291288; doi:10.1038/s41586-024-07701-9), 2024-07-17

**Supplementary information**

---

**Inhibition of IL-11 signalling extends mammalian healthspan and lifespan**

---

In the format provided by the authors and unedited

# Supplementary Figure 1. Raw blots

## Figure 1b and Extended Data Figure 1a

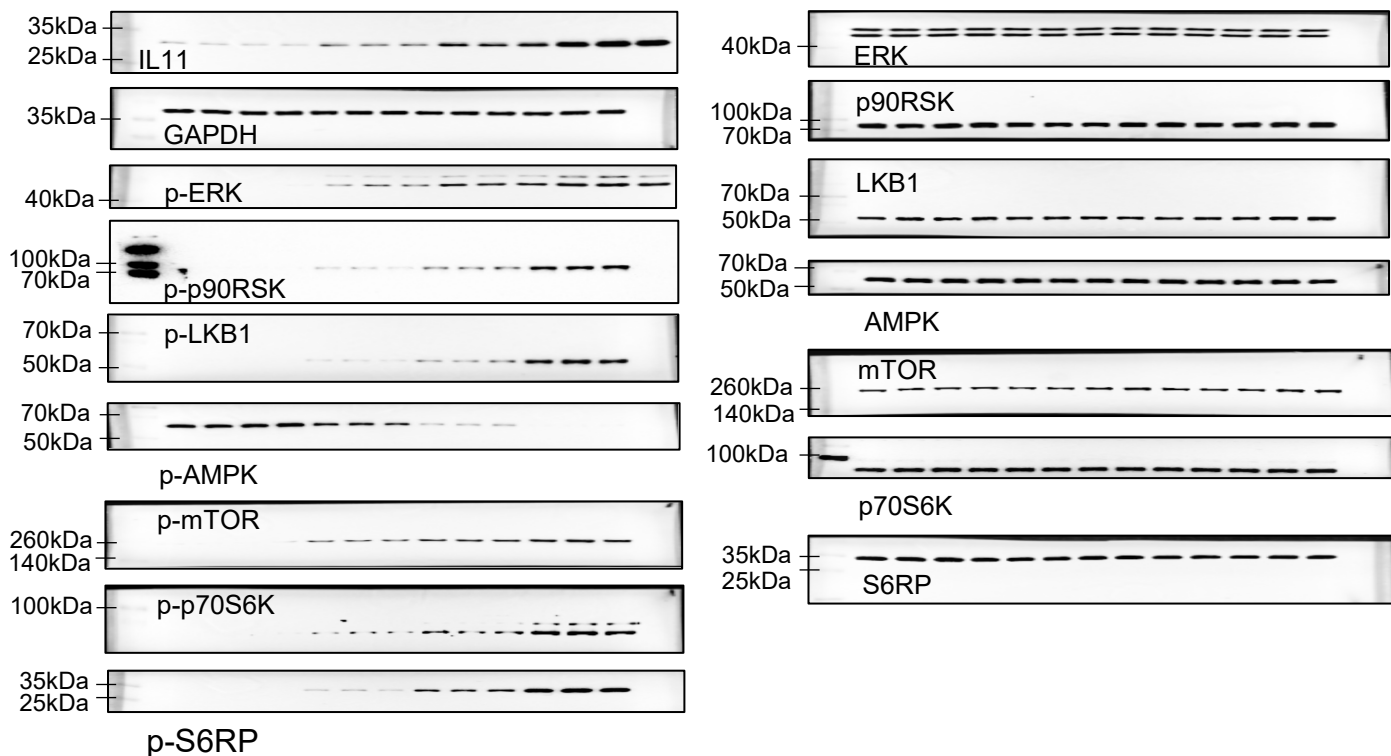

## Figure 1c and Extended Data Figure 1b

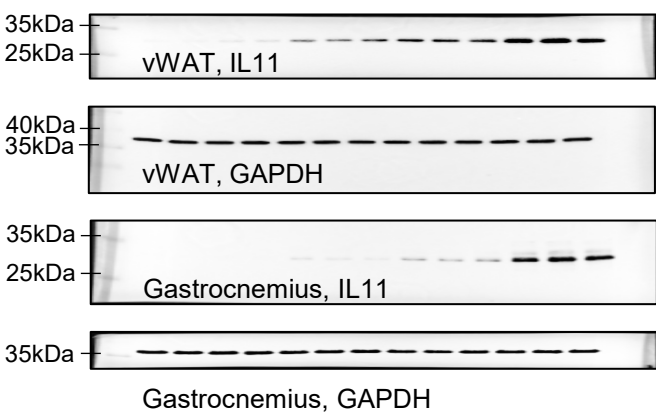

Figure 1e and Extended Data Figure 2a

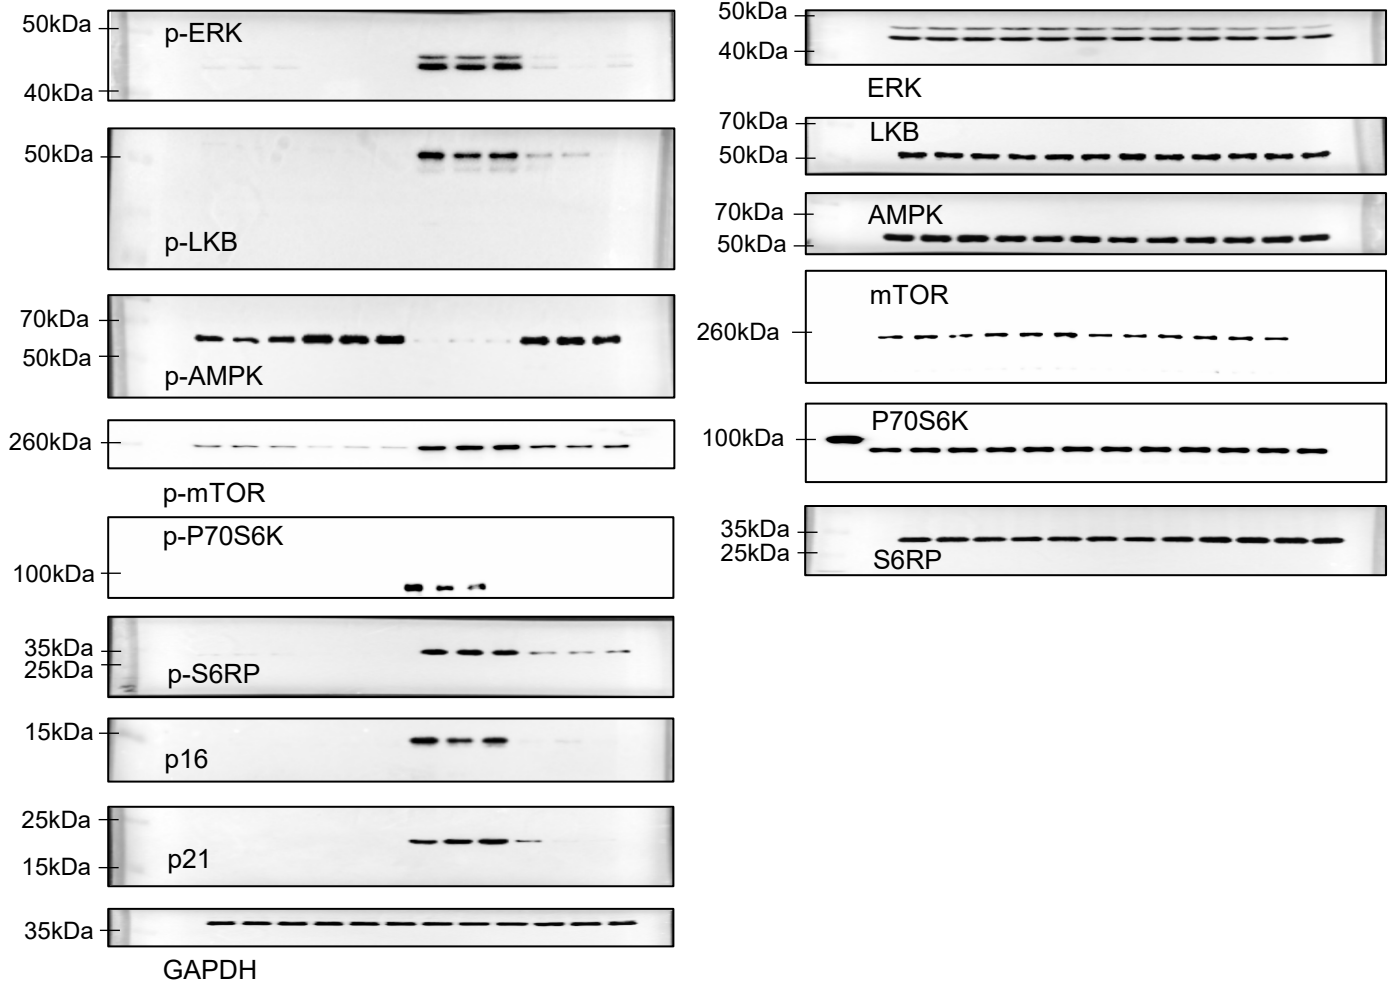

Figure 1j

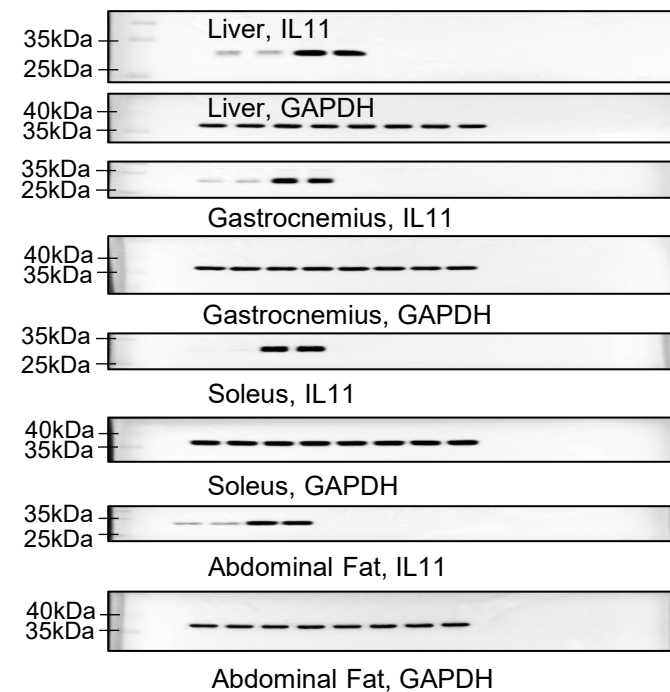

Figure 2j and Extended Data Figure 5k

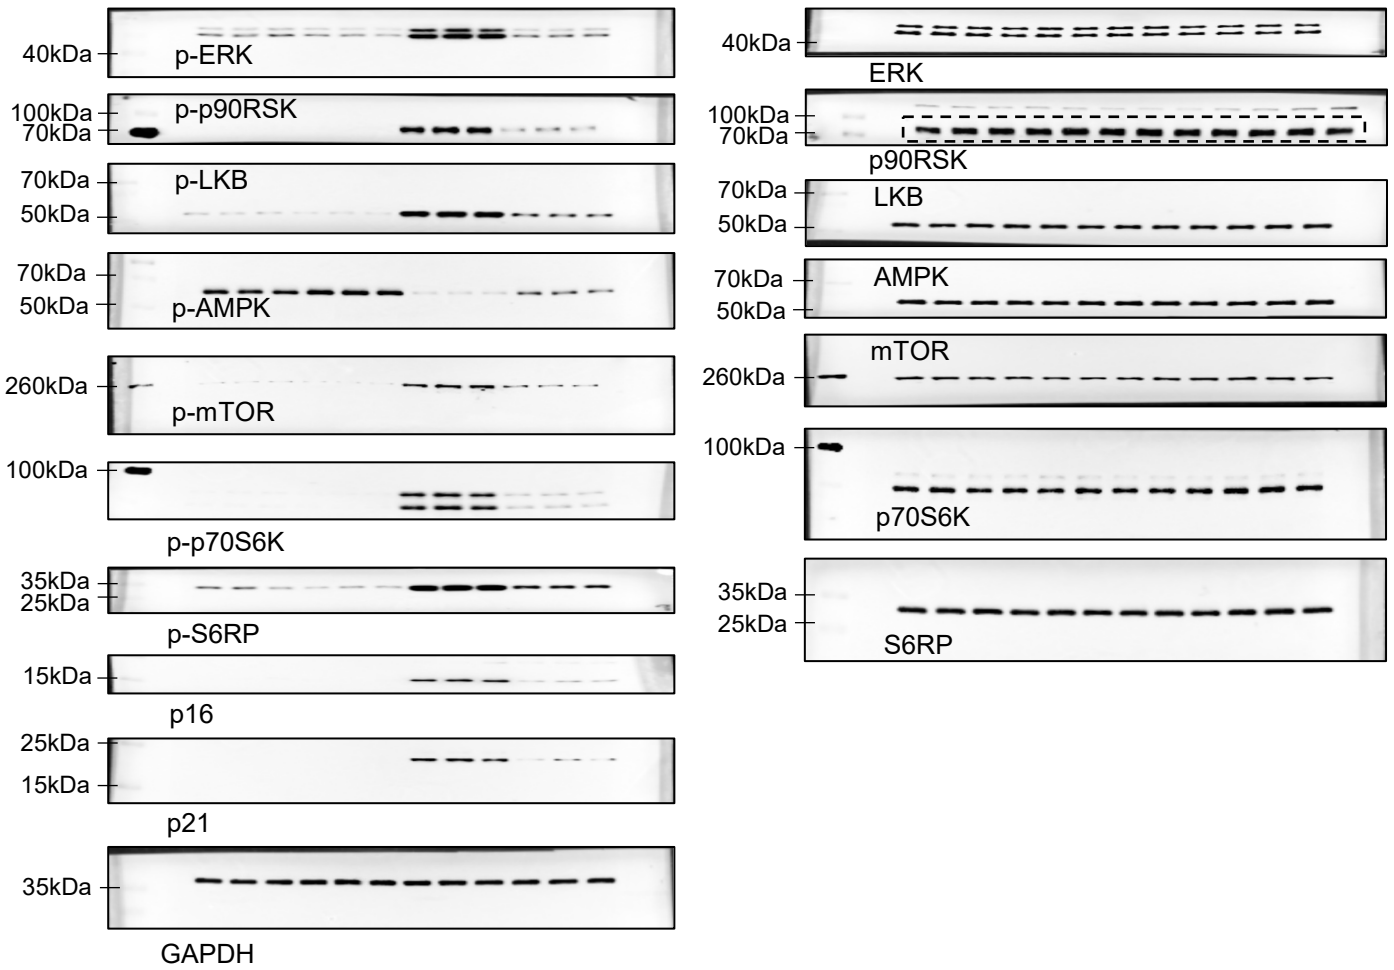

Figure 3m and Extended Data Figure 7i

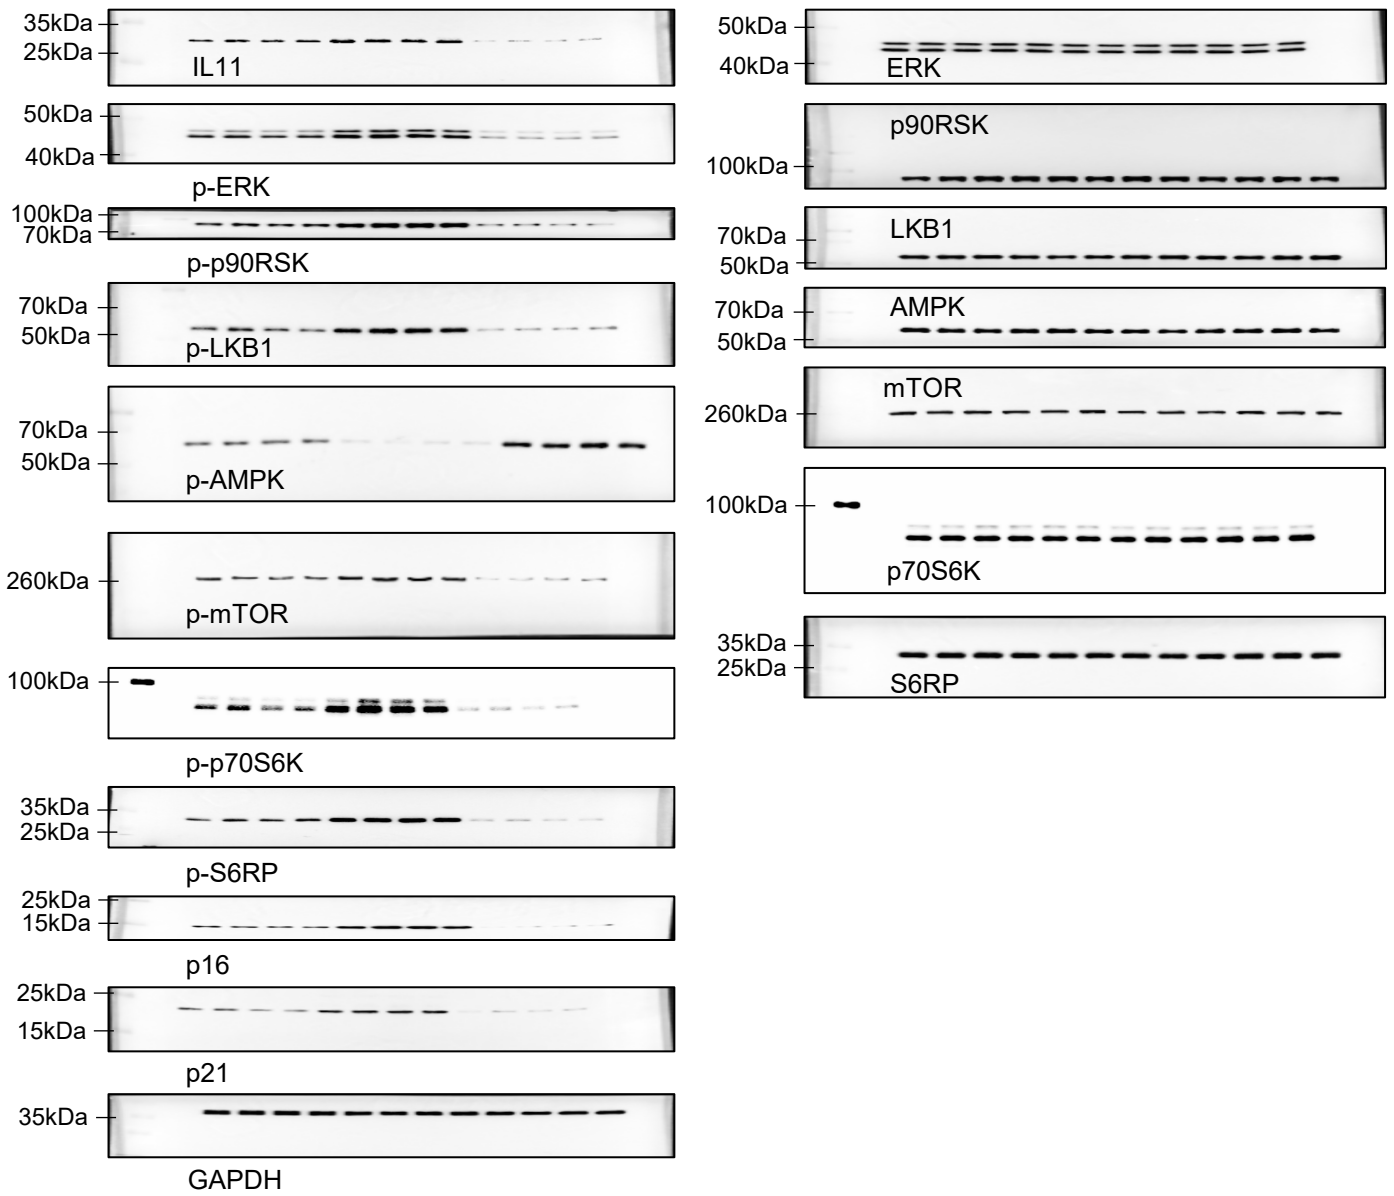

Figure 4e

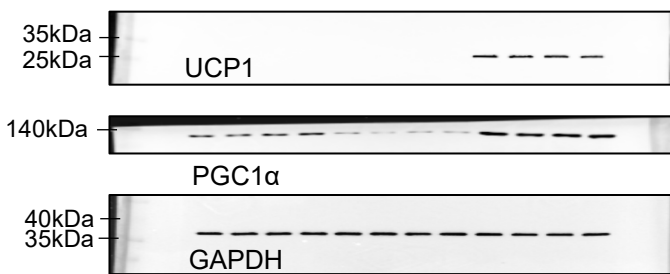

Figure 4f

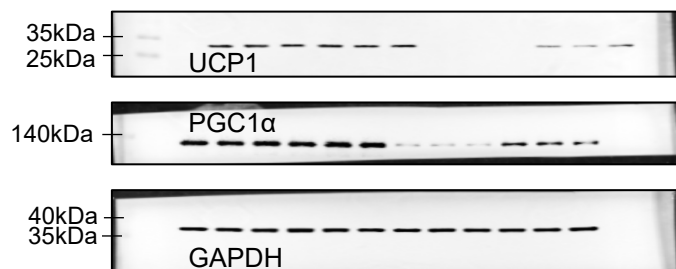

## Extended Data Figure 1b

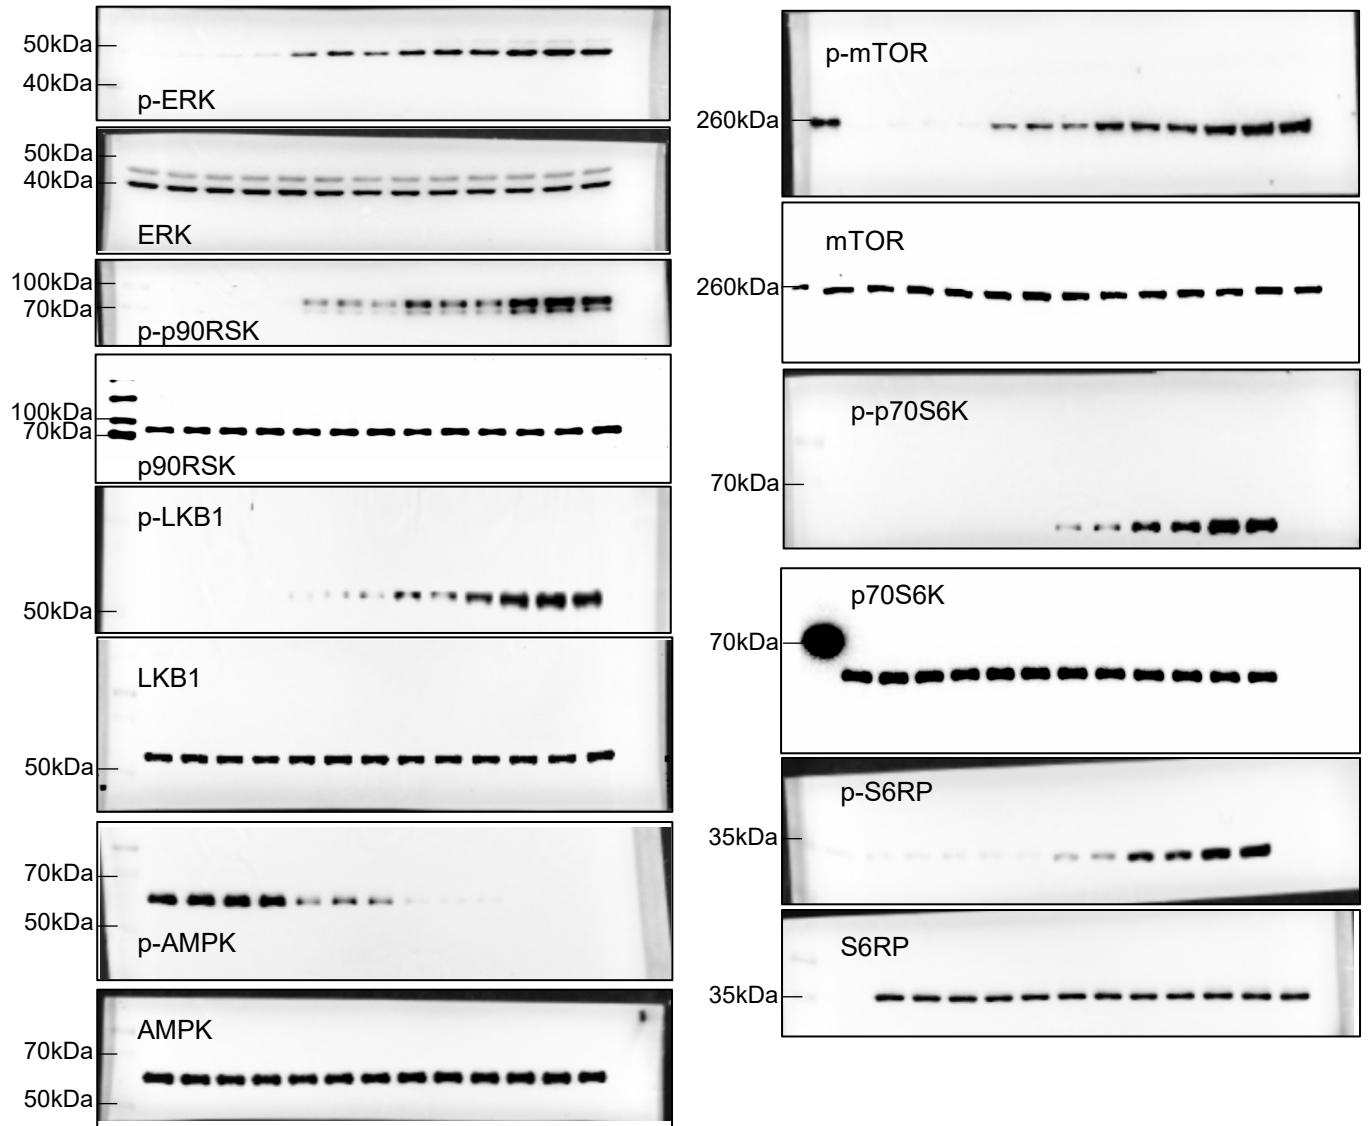

## Extended Data Figure 1d

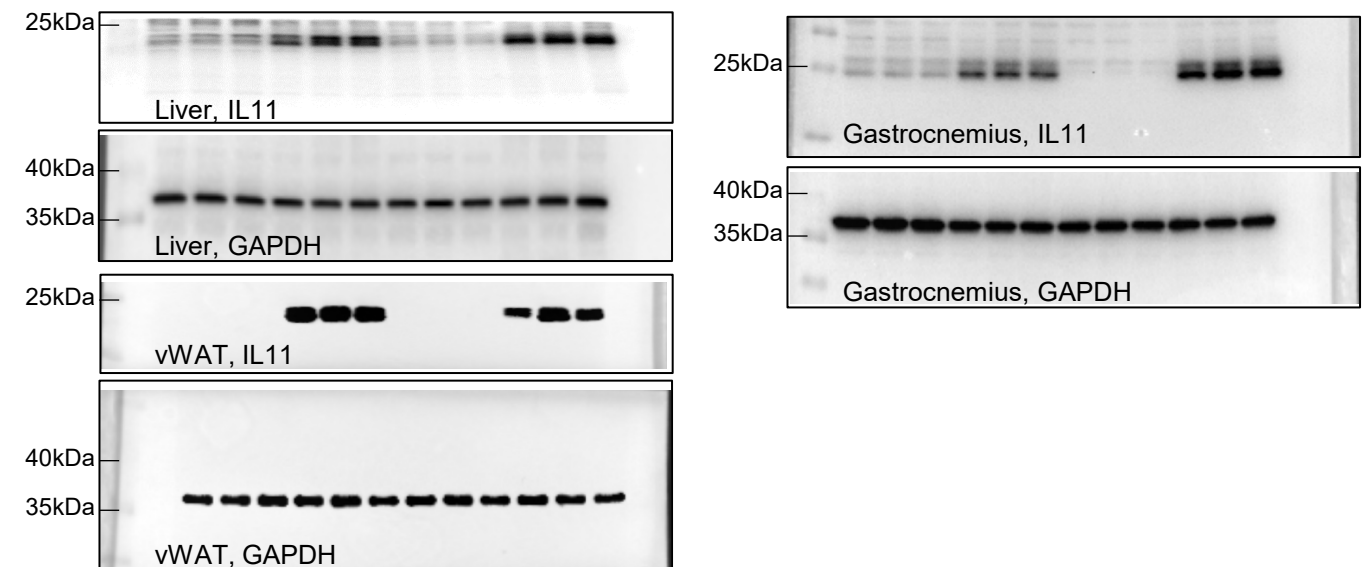

# Extended Data Figure 2b

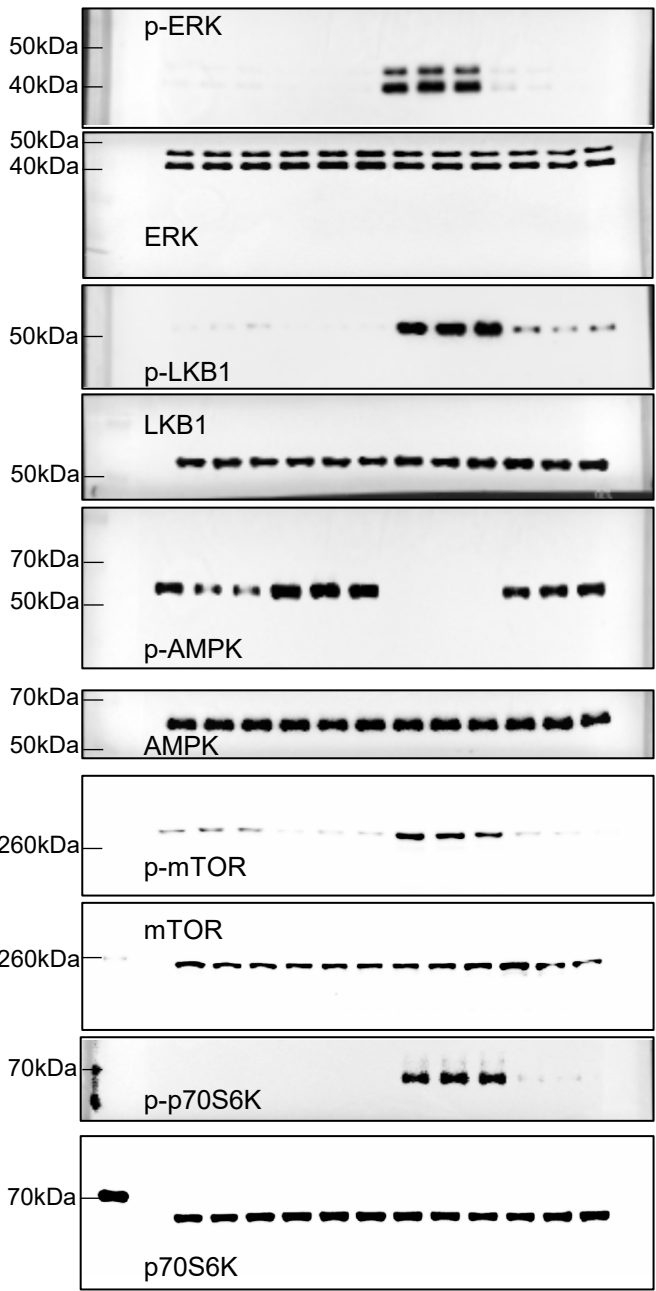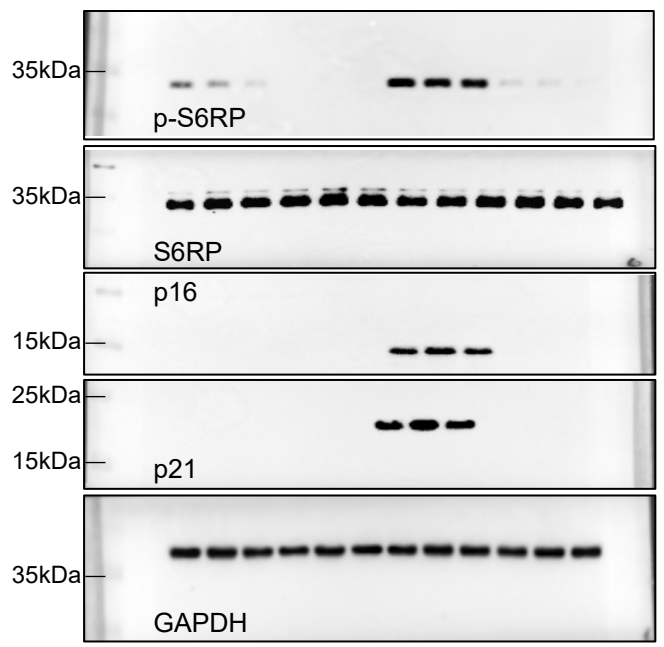

# Extended Data Figure 2c

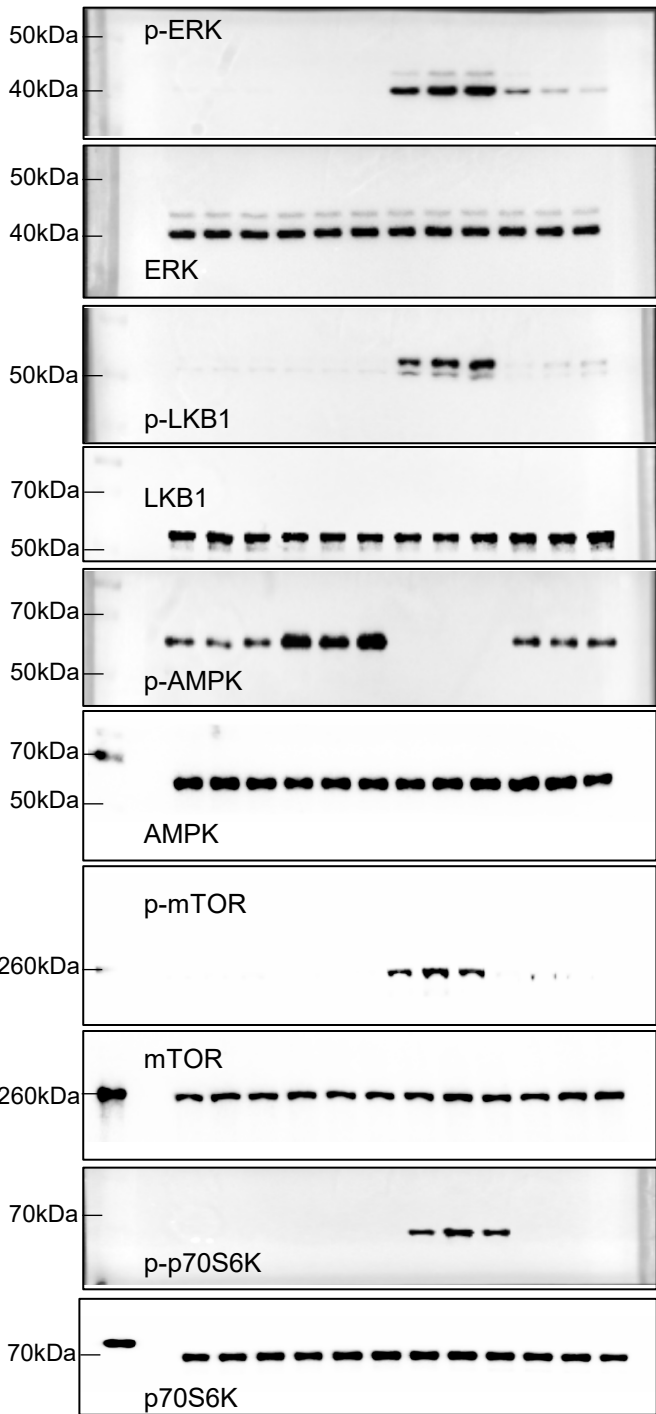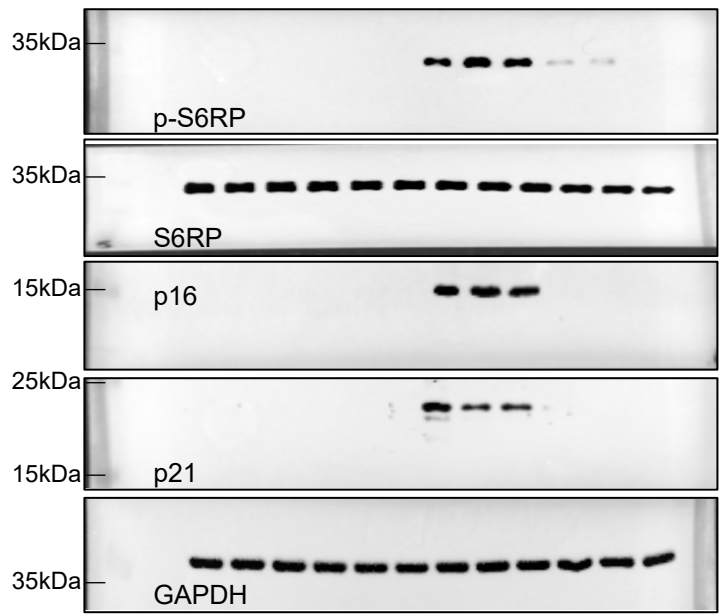



# Extended Data Figure 3a

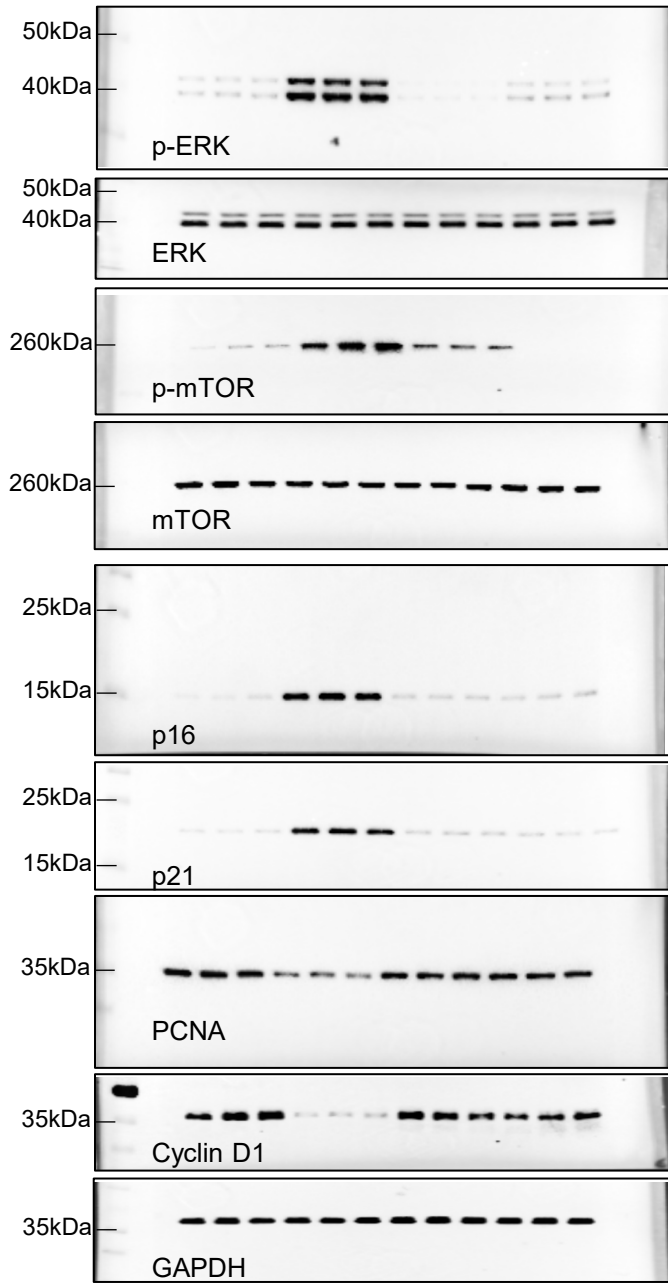

# Extended Data Figure 3b

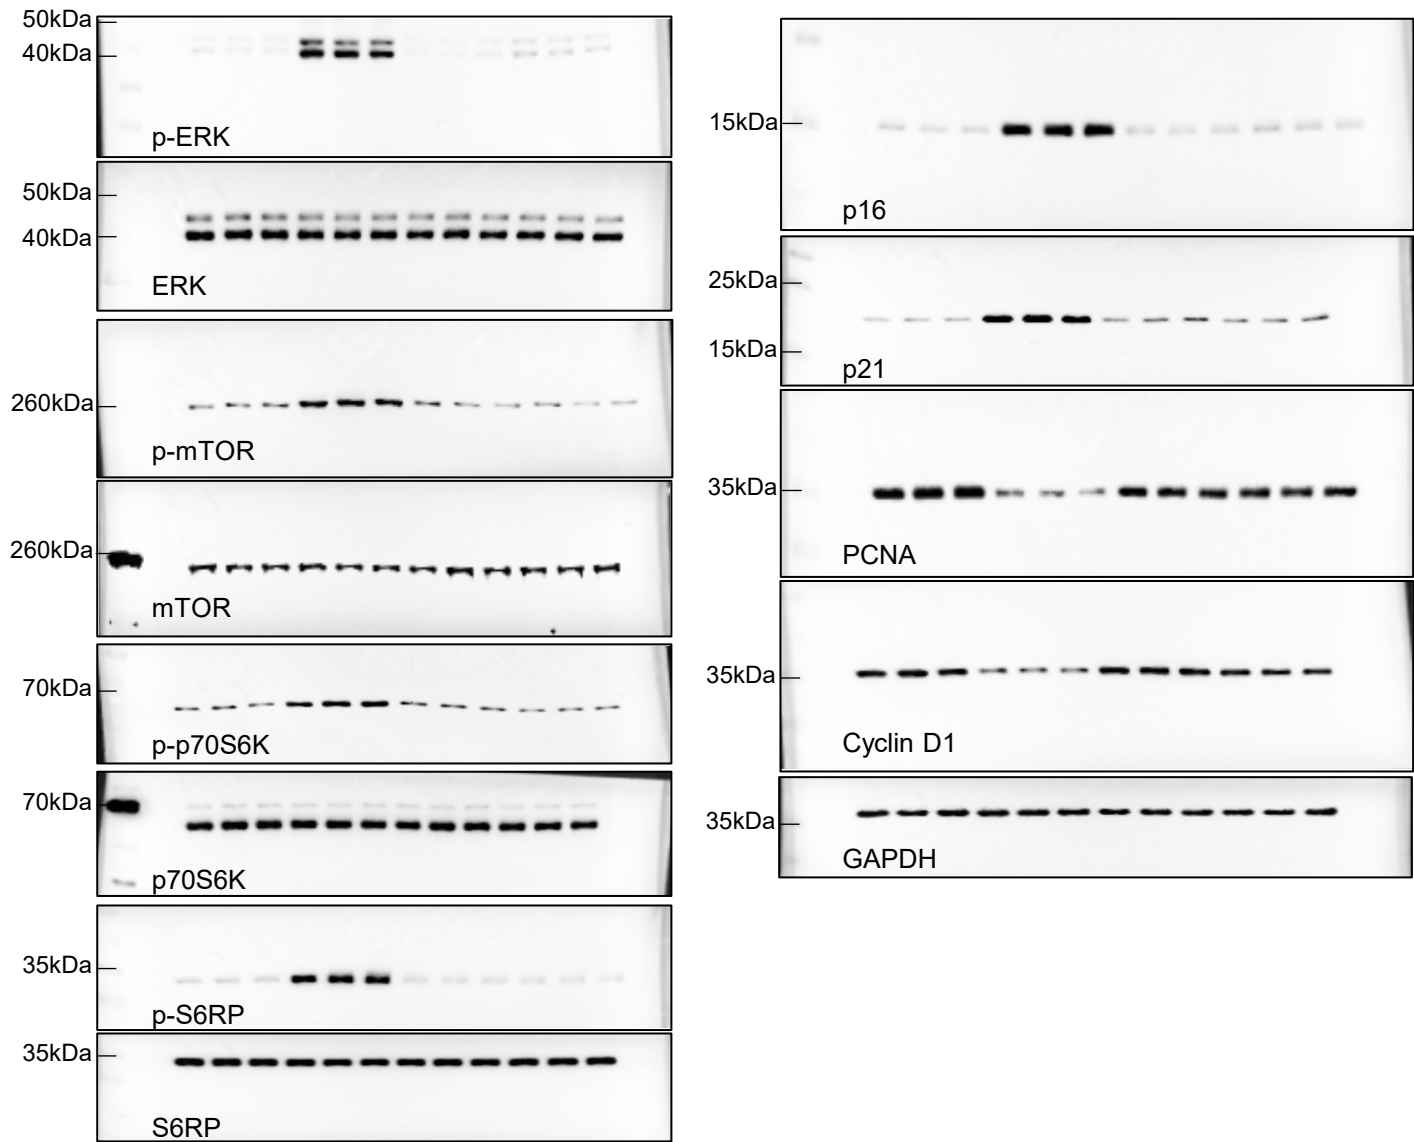

# Extended Data Figure 4a

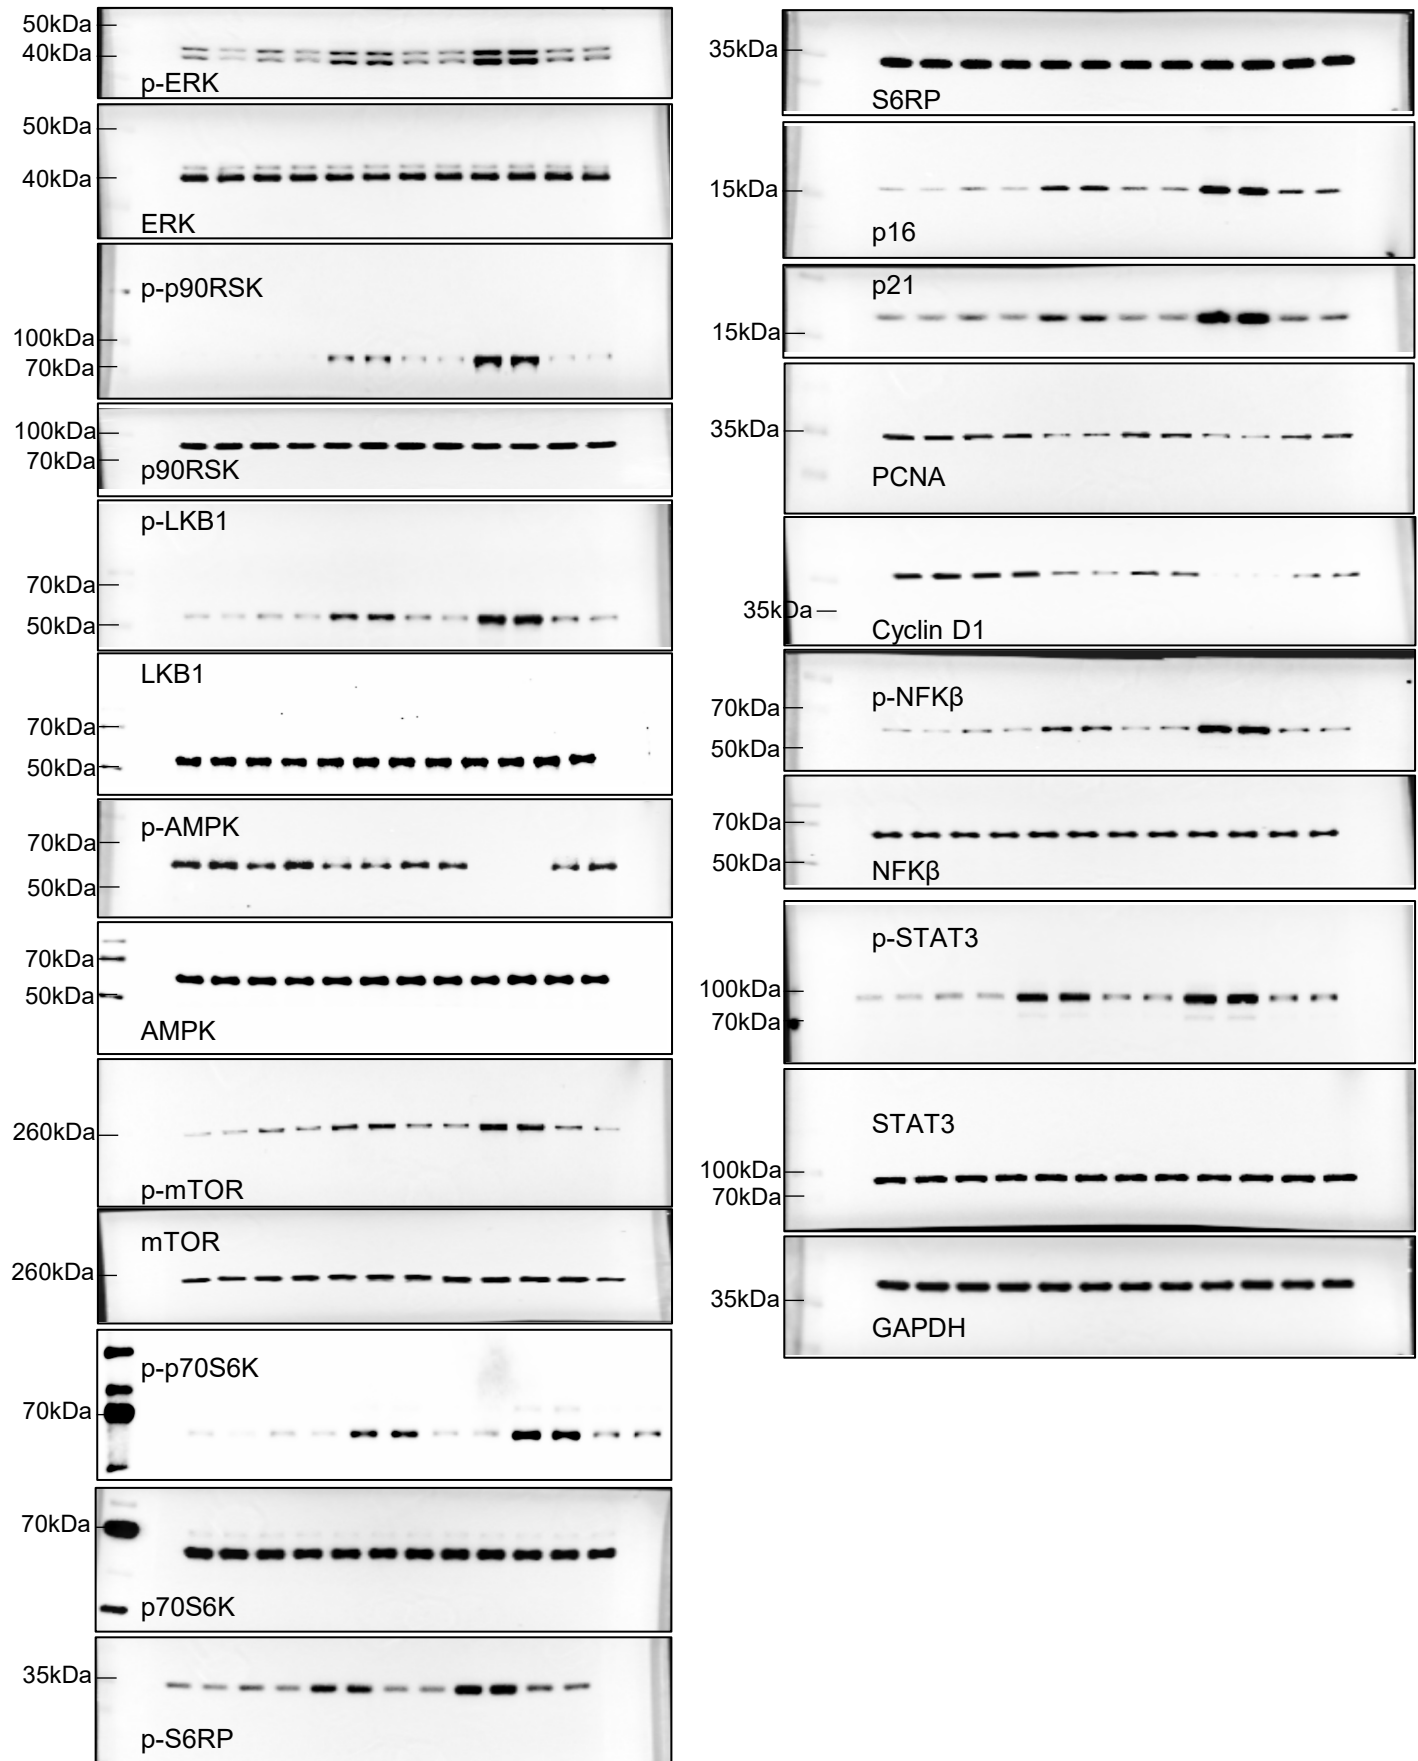

## Extended Data Figure 4d

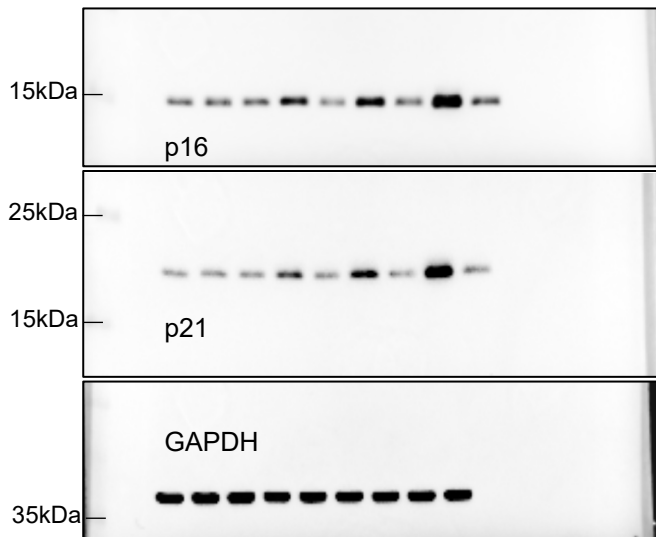

## Extended Data Figure 5l

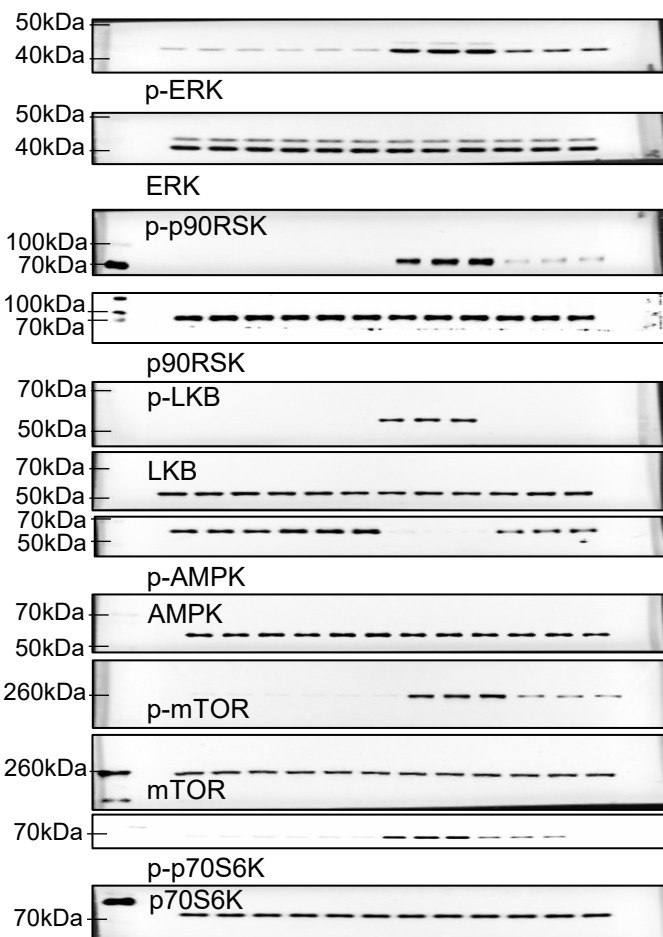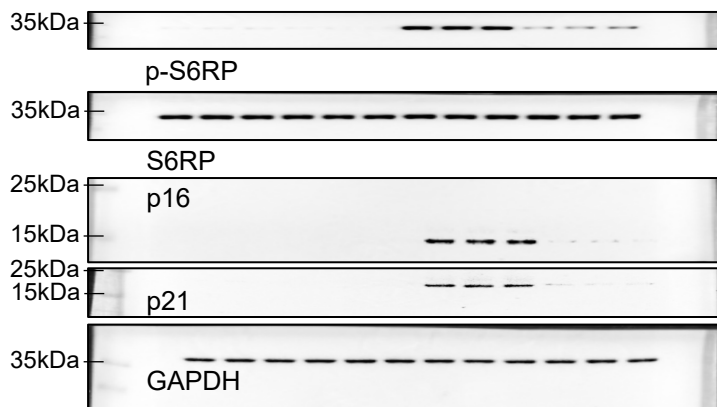

# Supplementary Figure 2. Immunoblots densitometry analysis.

## Figure 1b (total protein blots in Extended Data Figure 1a)

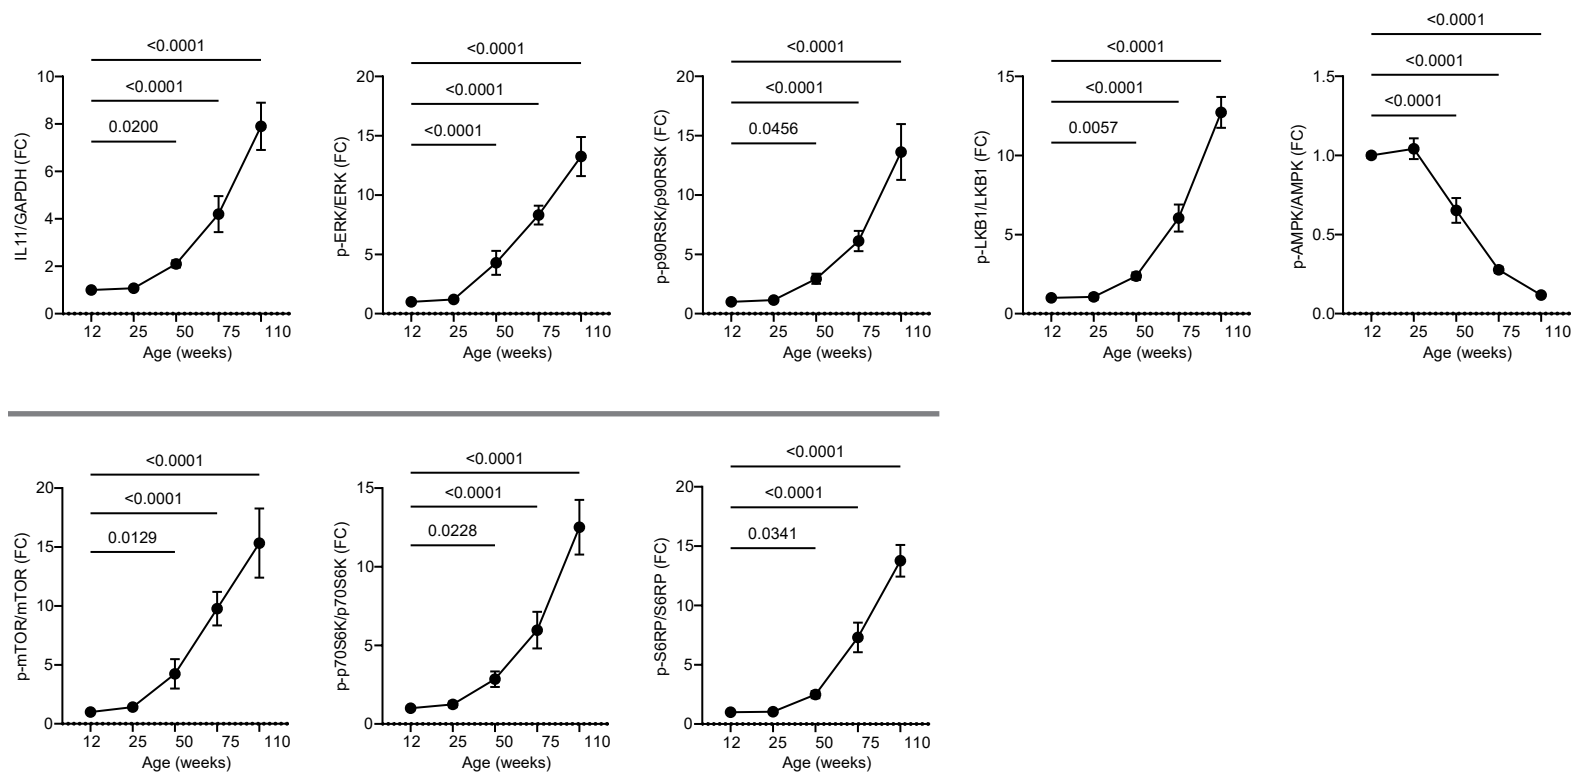

## Figure 1e (total protein blots in Extended Data Figure 2a)

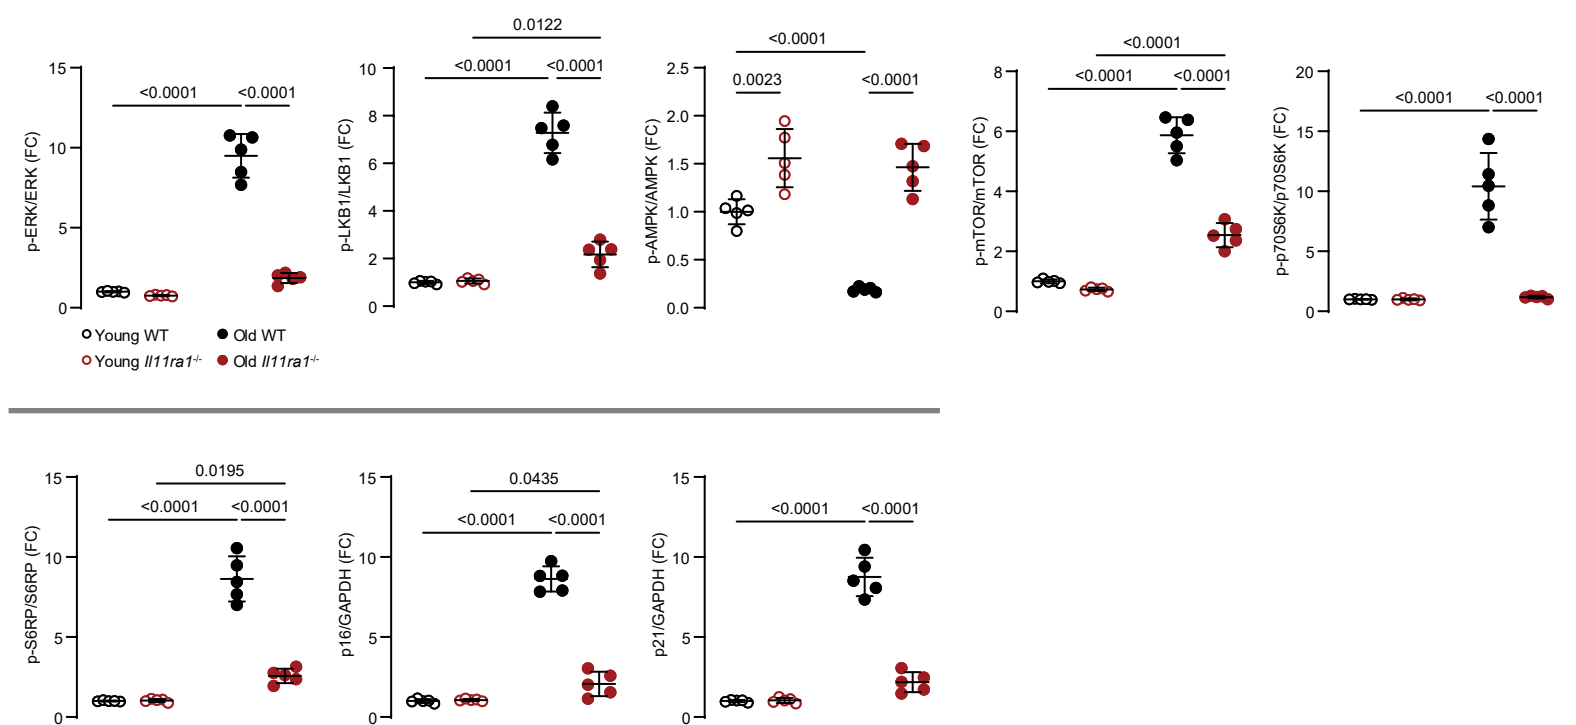

## Figure 1j

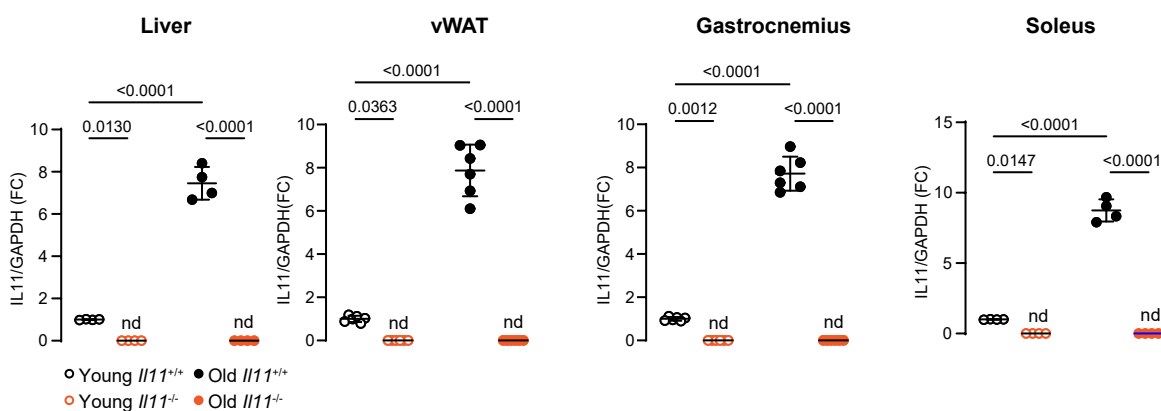

**Figure 2j (total protein blots in Extended Data Figure 5k)**

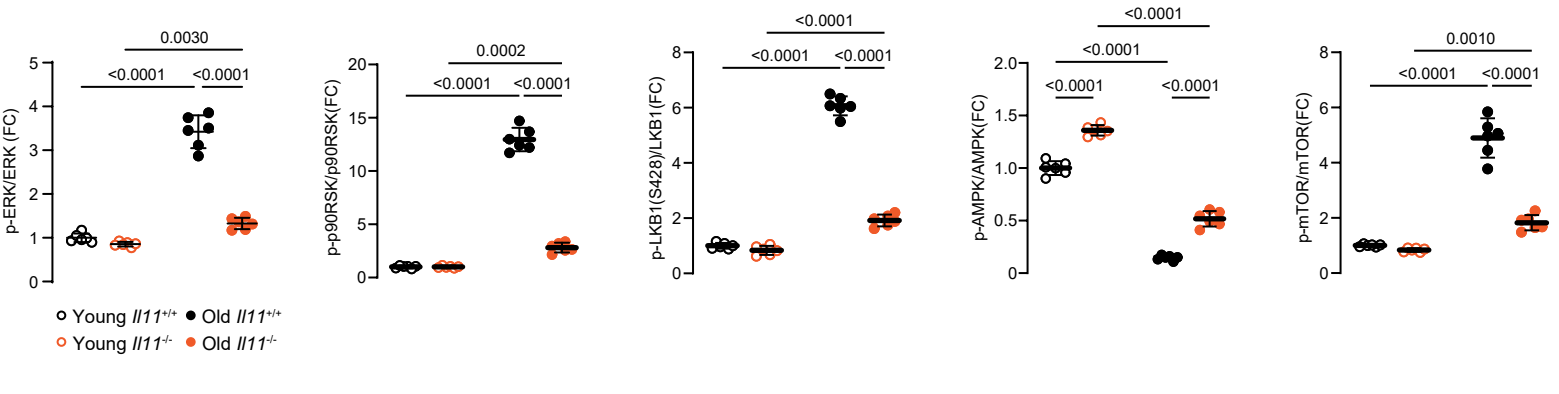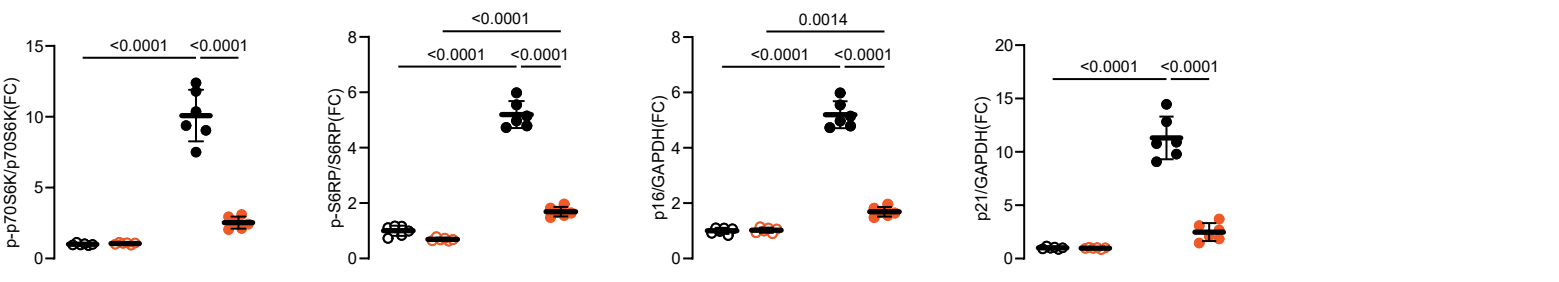

**Figure 3m (total protein blots in Extended Data Figure 7i)**

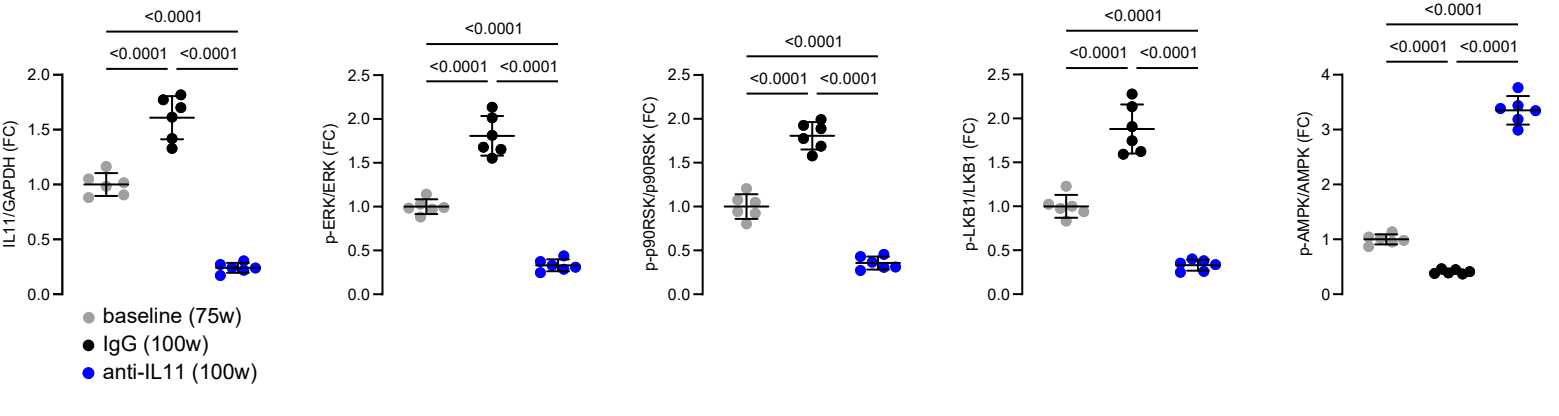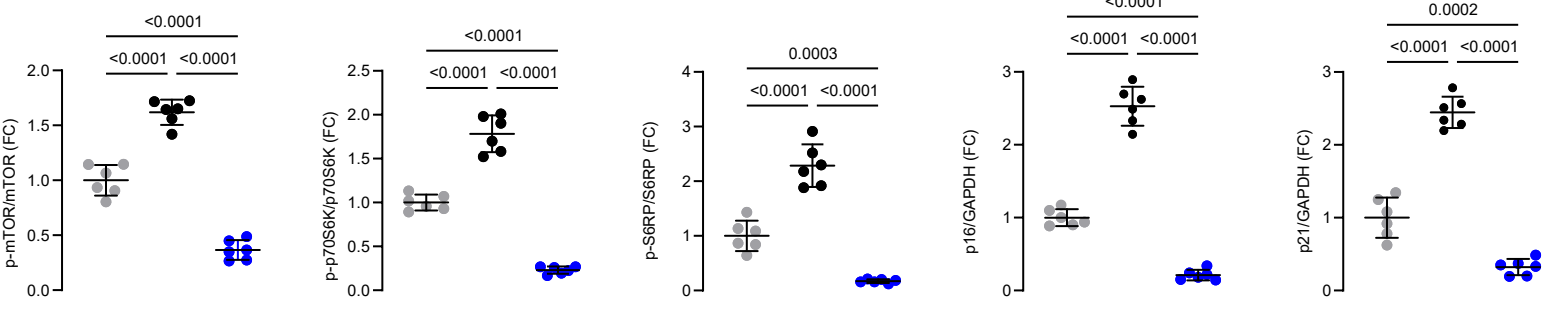

**Figure 4e**

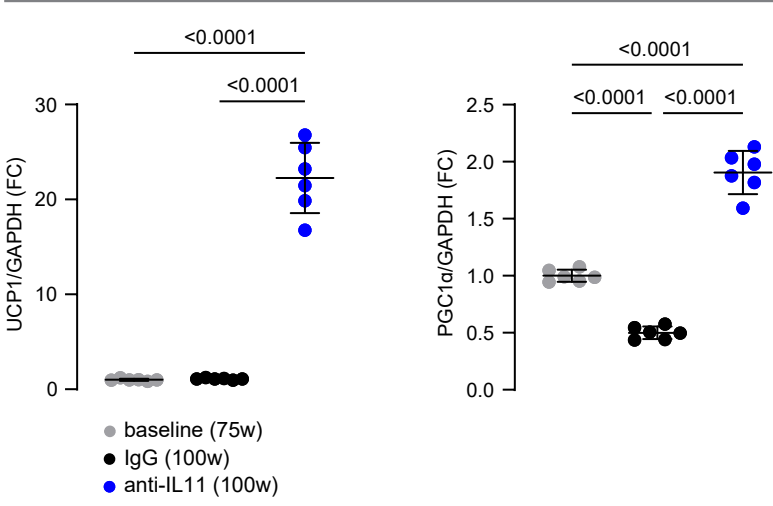

**Figure 4f**

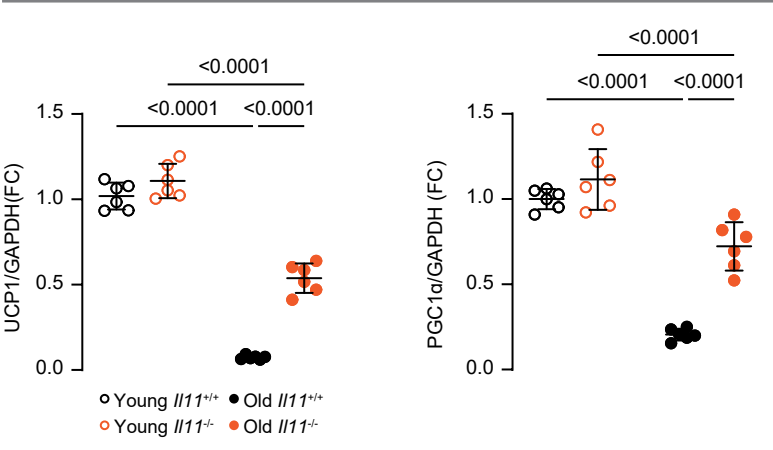

## Extended Data Fig 1b

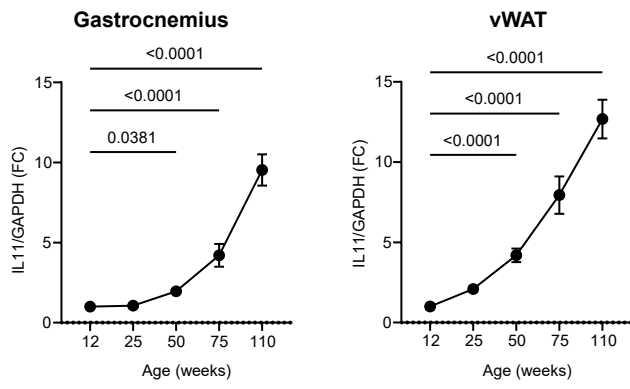

## Extended Data Fig 1c

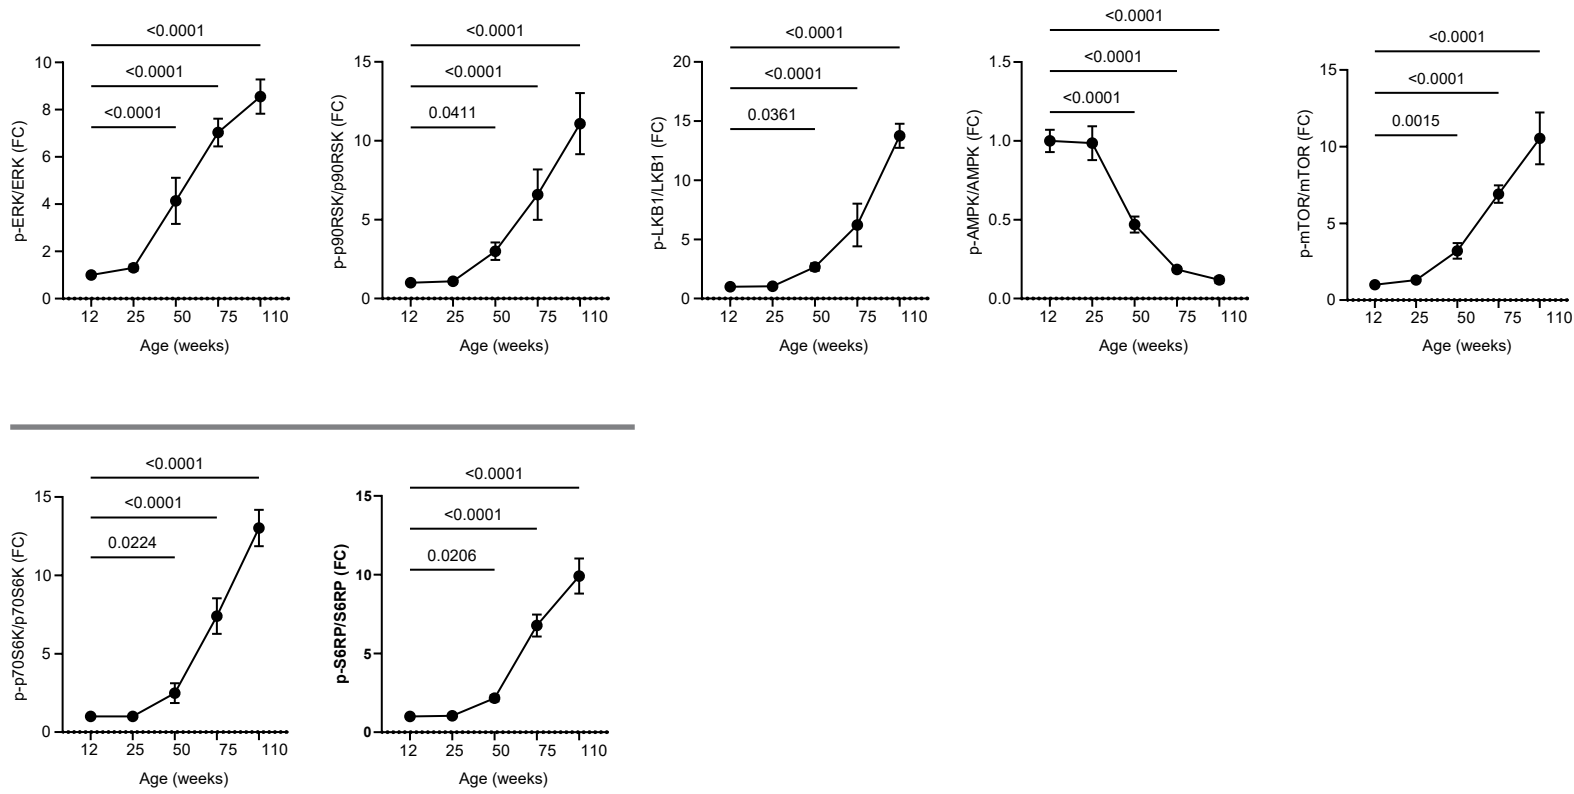

## Extended Data Fig 1d

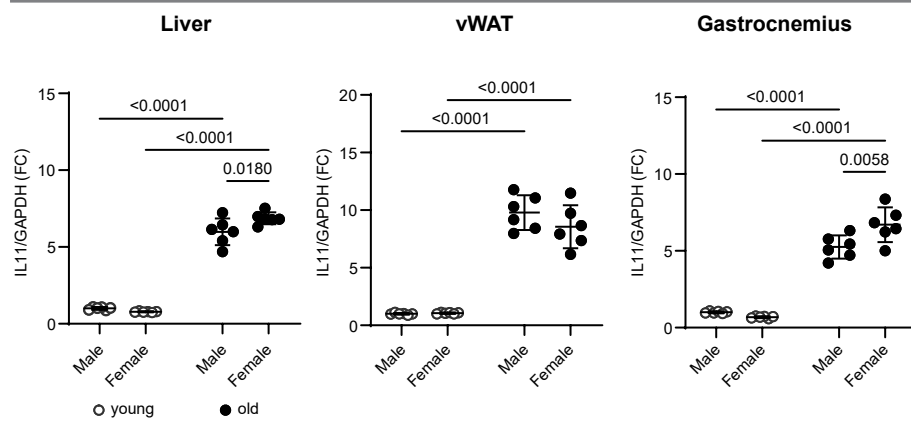



**Extended Data Fig 2b**

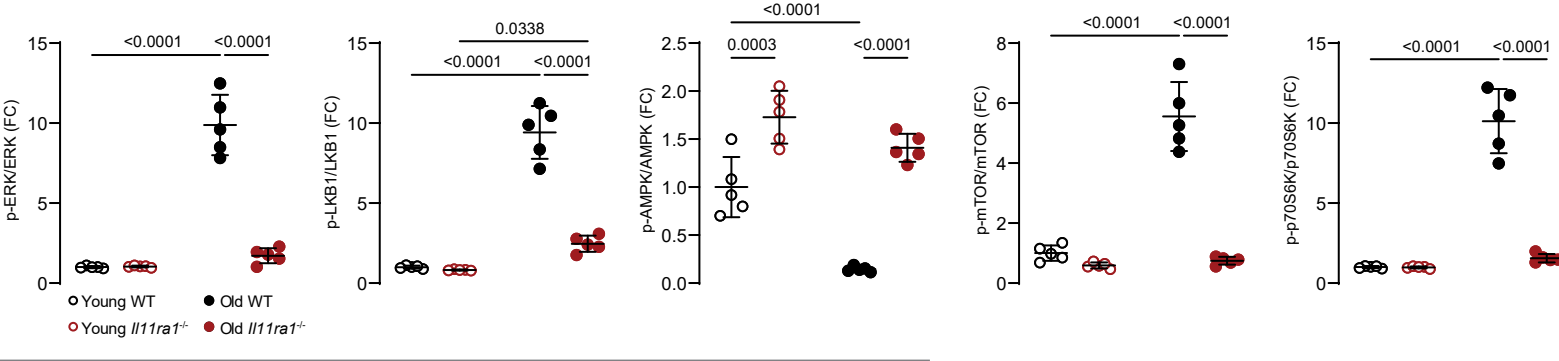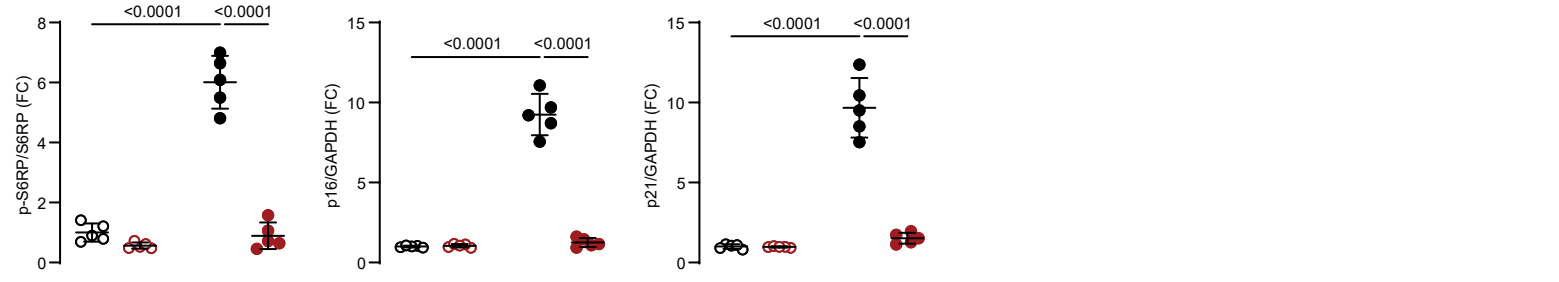

**Extended Data Fig 2c**

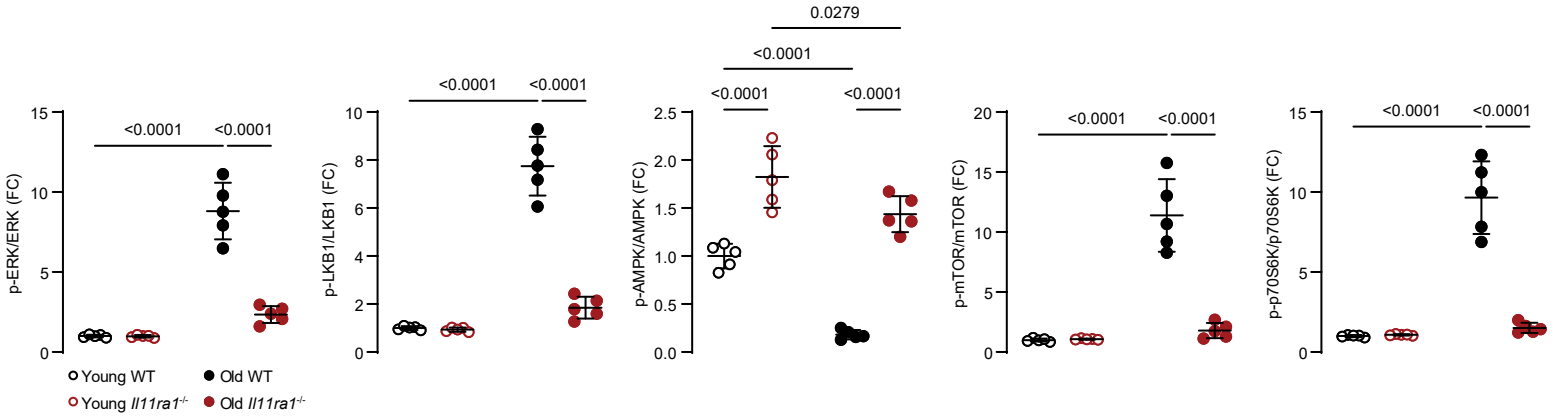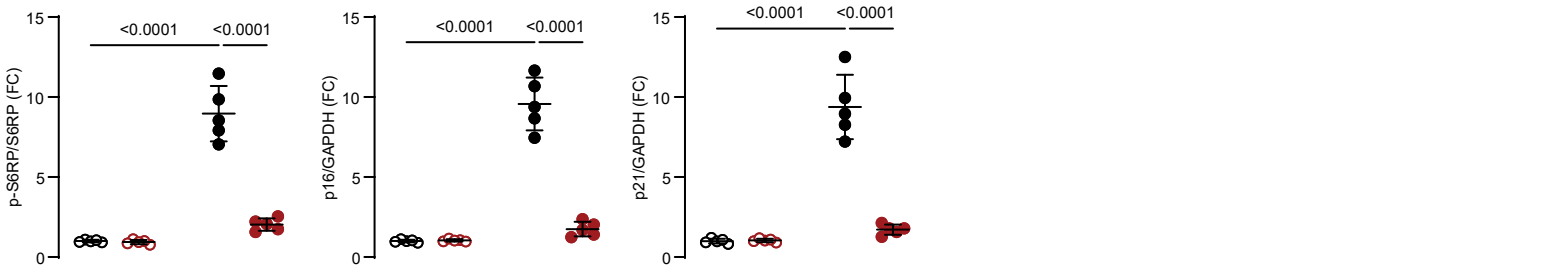

**Extended Data Fig 3a**

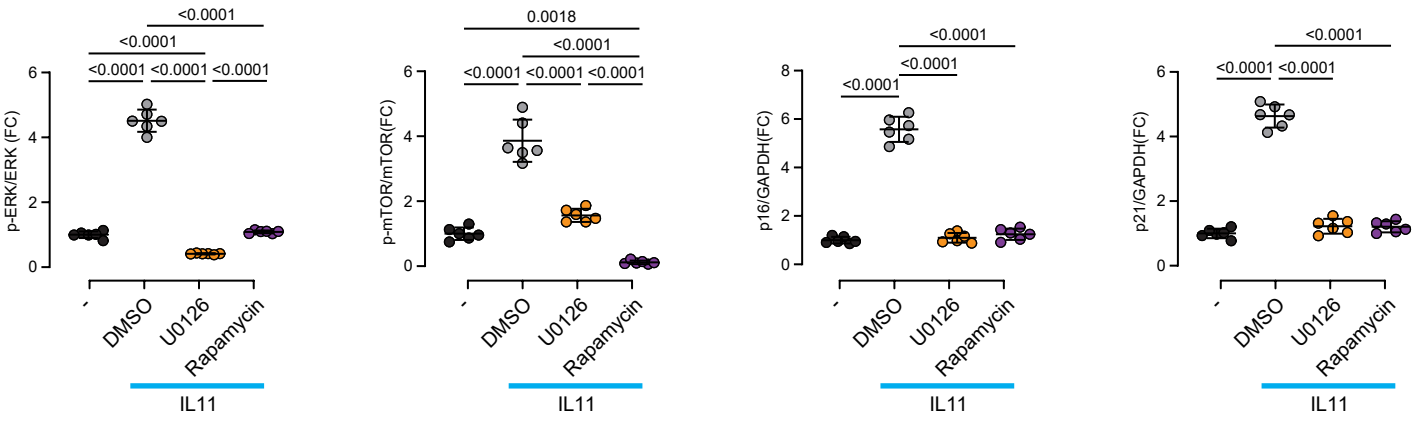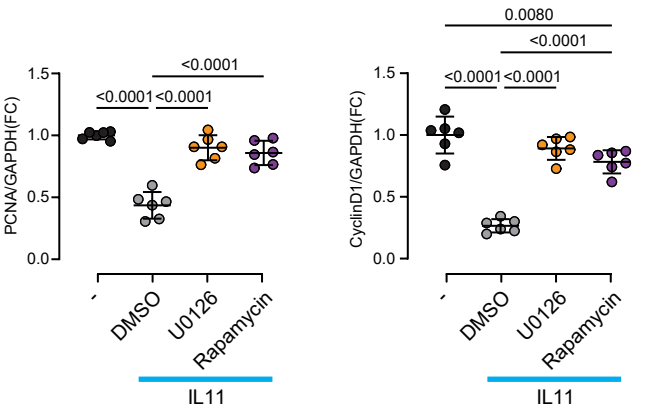

**Extended Data Fig 3b**

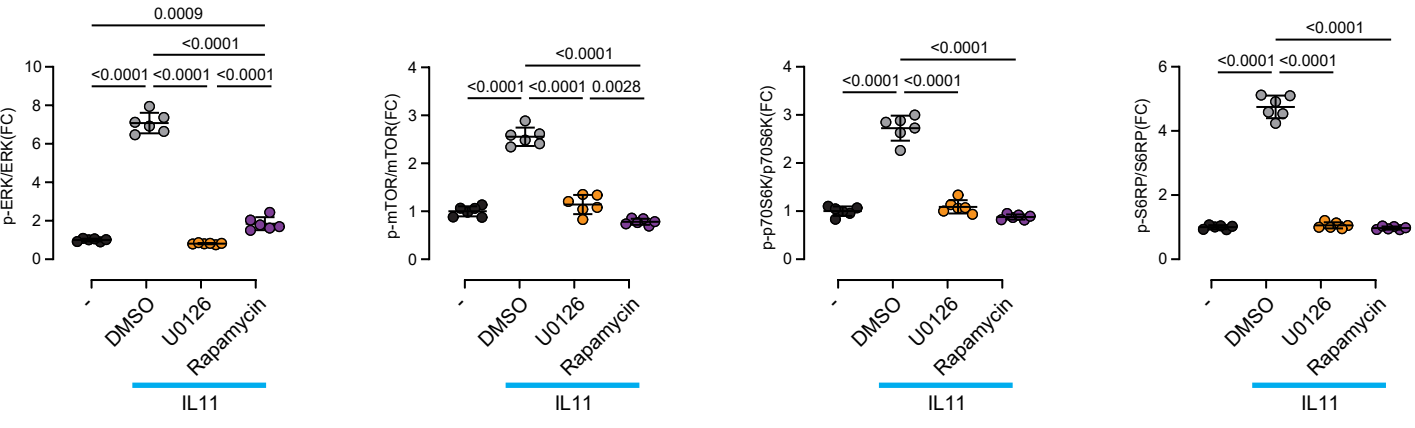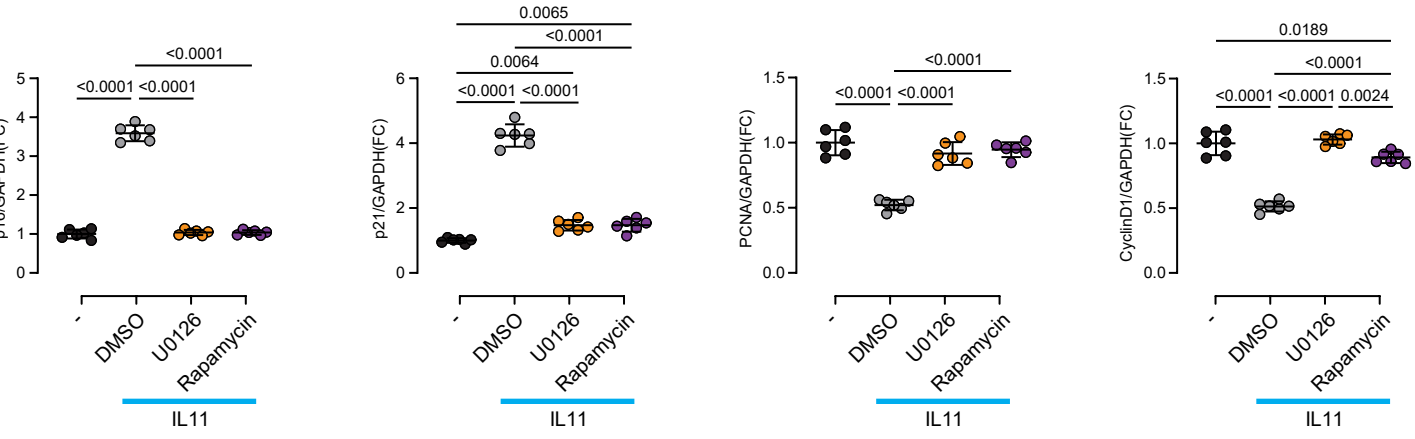

### Extended Data Fig 4a

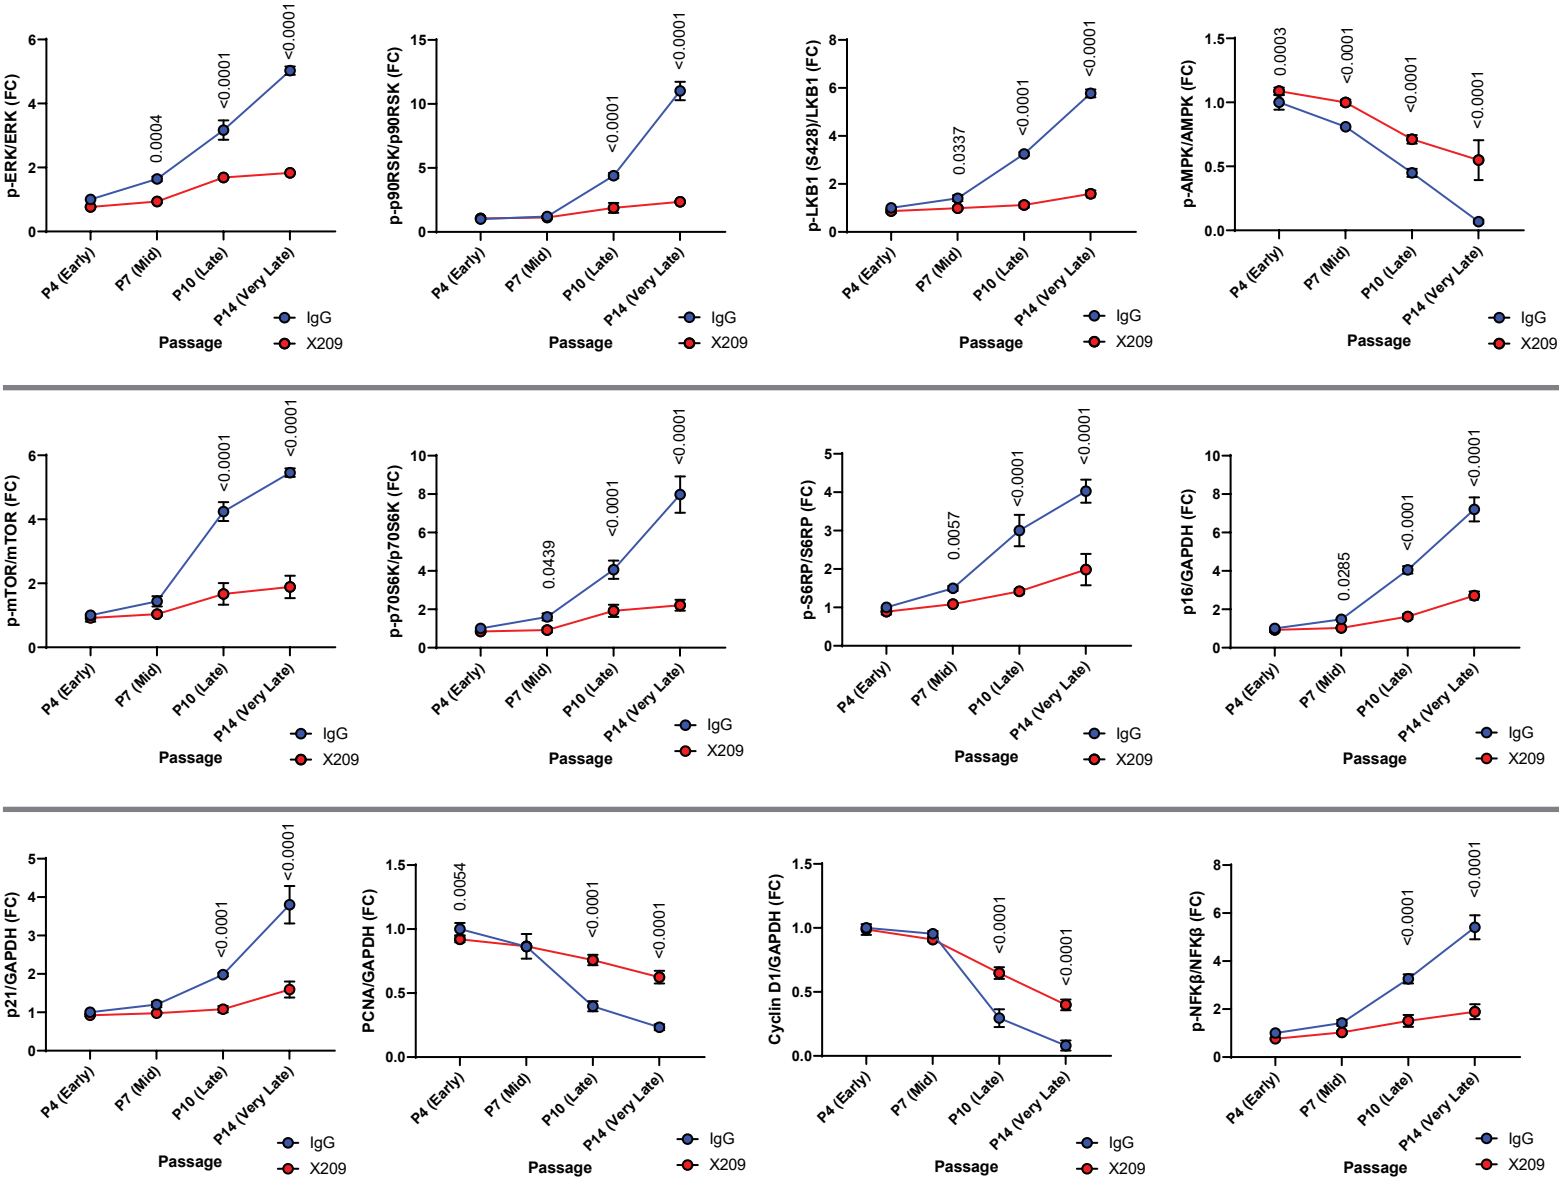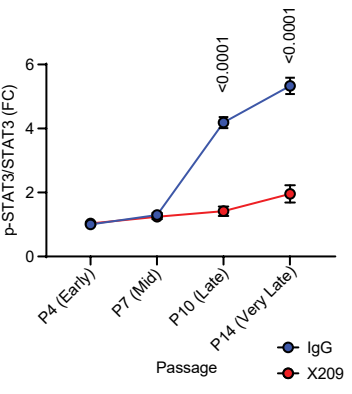

### Extended Data Fig 4d

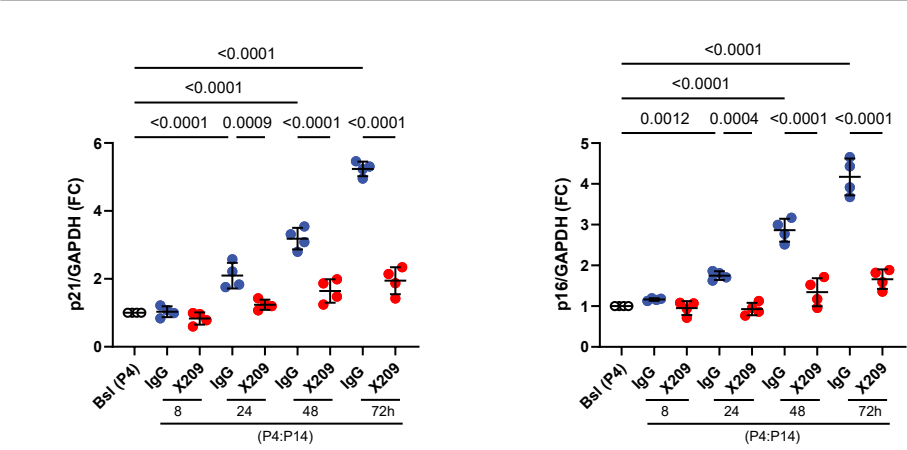

# Extended Data Figure 5I

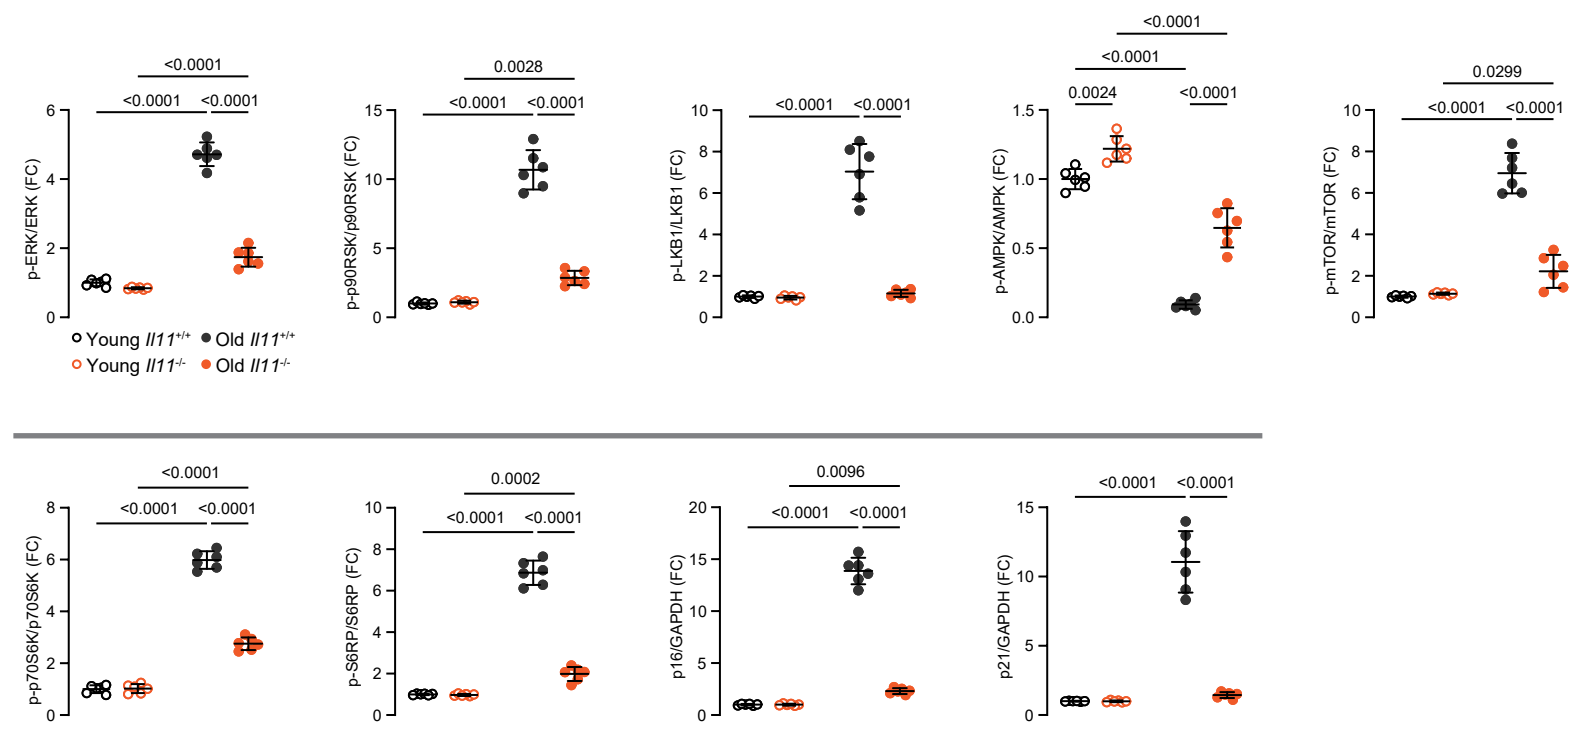

Supplement: 41586_2024_7701_MOESM1_ESM.pdf [file 41586_2024_7701_MOESM1_ESM.pdf]
