# Supplementary material for: Inhibition of IL-11 signalling extends mammalian healthspan and lifespan
Source: PubMed Central journal article supplement (PMC11291288; doi:10.1038/s41586-024-07701-9), 2024-07-17
Supplement: 41586_2024_7701_MOESM10_ESM.pdf [file 41586_2024_7701_MOESM10_ESM.pdf]

**Extended Data Table 8. Primer list.**

---

| <b>Host</b> | <b>Gene</b>                  | <b>Forward (5'-3')</b>   | <b>Reverse (5'-3')</b>  |
|-------------|------------------------------|--------------------------|-------------------------|
| Mouse       | <i>Acc1</i>                  | ATTGGGCACCCAGAGCTA       | CCCGCTCCTTCAACTTGCT     |
|             | <i>Ccl2</i>                  | GAAGGAATGGGTCCAGACAT     | ACGGGTCAACTTCACATTCA    |
|             | <i>Ccl5</i>                  | GCTGCTTTGCCTACCTCTCC     | TCGAGTGACAAACACGACTGC   |
|             | <i>Fasn</i>                  | CATGACCTCGTGATGAACGTGT   | CGGGTGAGGACGTTTACAAAG   |
|             | <i>Gapdh</i>                 | CTGGAAAGCTGTGGCGTGAT     | GACGGACACATTGGGGGTAG    |
|             | <i>Il1<math>\beta</math></i> | CACAGCAGCACATCAACAAG     | GTGCTCATGTCCTCATCCTG    |
|             | <i>Il6</i>                   | CTCTGGGAAATCGTGAAAT      | CCAGTTTGGTAGCATCCATC    |
|             | <i>Srebp1c</i>               | ATCGGCGCGGAAGCTGTCTGGGGT | ACTGTCTTGGTTGTTGATGAGCT |
|             | <i>Tnfa</i>                  | ATGAGAAGTTCCCAAATGGC     | CTCCACTTGGTGGTTTGCTA    |
|             | <i>Ucp1</i>                  | ACTGCCACACCTCCAGTCATT    | CTTGCCTCACTCAGGATTGG    |

---
